# Supplementary material for: [Retracted] Rhodiola Rosea Extract Counteracts Stress in an Adaptogenic Response Curve Manner via Elimination of ROS and Induction of Neurite Outgrowth
Source: Hindawi journal article supplement (doi:10.1155/2022/5647599), 2022-01-01
Supplement: f1 [file 5647599.f1.docx]

**Supplementary information**

**Supplementary Figure 1.** Effect of RRE on ROS levels and cell metabolic activity in HT22 cells under dexamethasone-induced stress. A) RRE at 5 ng/ml significantly decreased the dexa-induced cytosolic ROS. B) Dexa-induced increase in mitochondrial ROS was signidicantly reduced by RRE. C) RRE at 1-10 ng/ml significantly reduced the dexa-induced increase in mitochondrial superoxide anion levels. D) The cell viability was decreased in Dexa-treated HT22 cells. The RRE concentrations 5 and 10 ng/ml prevented this decrease. Values represent the mean ± SEM of three independent experiments and were normalized on the untreated group (= 100%). One way ANOVA and post hoc Dunnett's multiple comparison test versus Dexa was used. *p < 0.05, **p < 0.01, ***p < 0.001.

**Supplementary Table 1:** Effect of RRE on cell viability in SH-SY5Y cells (pre-screening)

|  |  |  | **RRE ng/ml** | | | | | | | |
| --- | --- | --- | --- | --- | --- | --- | --- | --- | --- | --- |
|  | **CTRL** | **DMSO 0.005%** | **1** | **5** | **10** | **20** | **100** | **200** | **300** | **500** |
| **Mean** | 100 | 99.39 | 109.6 | 111.3 | 113.9 | 106.6 | 103.2 | 96.91 | 94.16 | 93.46 |
| **Std. Error of Mean** | 0.7388 | 2.068 | 2.844 | 4.018 | 4.135 | 2.056 | 1.924 | 1.459 | 1.455 | 2.77 |
| **Adjusted P Value** |  | 0.9997 | 0.0095 | 0.0022 | 0.0001 | 0.1379 | 0.8769 | 0.922 | 0.5122 | 0.5674 |

**Supplementary Table 2:** Effect of RRE on cell viability in HT22 cells (pre-screening)

|  |  |  | **RRE ng/ml** | | | | | | | |
| --- | --- | --- | --- | --- | --- | --- | --- | --- | --- | --- |
|  | **CTRL** | **DMSO 0.005%** | **1** | **5** | **10** | **20** | **100** | **200** | **300** | **500** |
| **Mean** | 100 | 102.7 | 108.9 | 122 | 119.5 | 114.8 | 105.8 | 103.5 | 104.1 | 98.42 |
| **Std. Error of Mean** | 2.769 | 3.502 | 3.655 | 3.815 | 3.569 | 3.857 | 6.024 | 5.428 | 3.144 | 4.373 |
| **Adjusted P Value** |  | 0.9972 | 0.4129 | 0.0001 | 0.0005 | 0.025 | 0.9849 | 0.9978 | 0.9934 | 0.9996 |
